# Supplementary material
Source: Springer Nature journal article supplement (https://www.springermedizin.de/resource/supplementary/13024_2012_372_MOESM1_ESM.pdf/9643850)
Supplement: MOESM1 [file 9643850]

**Monomers**

**Misfolded**

**Oligomers**

**Fibrils**

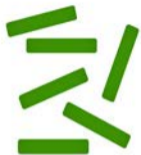

Chaperones  
HSPs

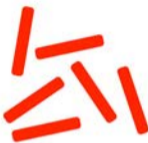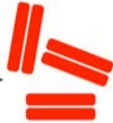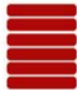

Autophagy

Proteasome

Disaggregation  
& Degradation
